# Supplementary material for: Volatilisation of substituted ferrocene compounds of different sizes from room temperature ionic liquids: a kinetic and mechanistic study
Source: Royal Society of Chemistry journal article supplement (doi:10.1039/c2nj20704d), 2012-01-01
Supplement: c2nj20704d.pdf [file c2nj20704d.pdf]

**Supporting Information for**  
**Volatilisation of Substituted Ferrocene Compounds of**  
**Differing Sizes from Room Temperature Ionic Liquids: A**  
**Kinetic Study**

*Chaopeng Fu,<sup>1</sup> Leigh Aldous,<sup>1</sup> Edmund J. F. Dickinson,<sup>1</sup> Ninie S. A. Manan<sup>2,3</sup> and Richard G. Compton<sup>1,\*</sup>*

<sup>1</sup> Department of Chemistry, Physical and Theoretical Chemistry Laboratory, University of Oxford, South Parks Road, Oxford OX1 3QZ, United Kingdom

<sup>2</sup> School of Chemistry and Chemical Engineering, The QUILL Centre, Queen's University Belfast, Belfast BT9 5AG, United Kingdom

<sup>3</sup> Department of Chemistry, Faculty of Science, University of Malaya, 50603, Kuala Lumpur, Malaysia

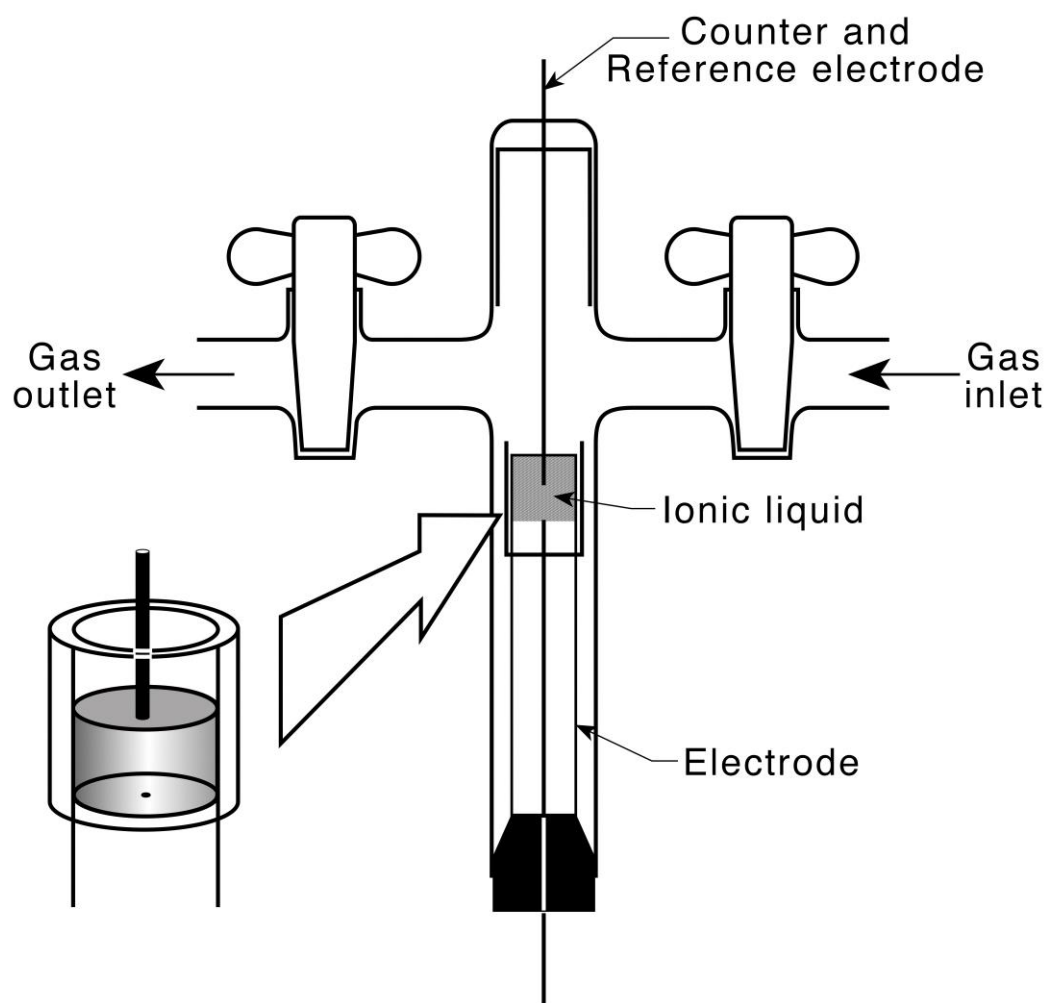

**Figure S1** Diagram demonstrating the experimental set-up and geometry of the IL in the T-cell (not to scale).

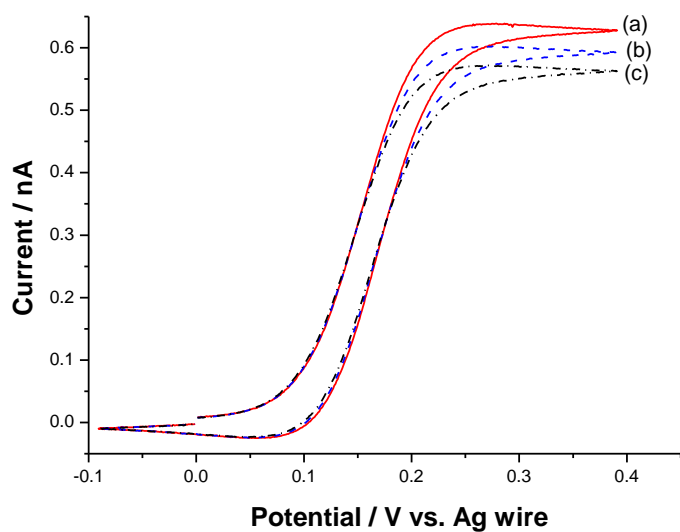

**Figure S2** Cyclic voltammetry displaying the oxidation of 1,1'-dimethylferrocene (initial concentration 11.9 mM) in 15  $\mu\text{L}$   $[\text{C}_4\text{mpyrr}][\text{NTf}_2]$  on a 10.4  $\mu\text{m}$  platinum microelectrode at 310.15 K, after (a) 210, (b) 510 and (c) 810 min flow of dry nitrogen.

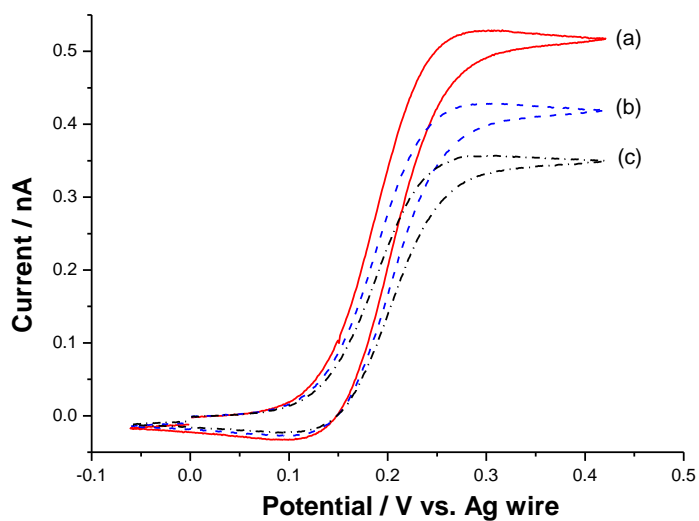

**Figure S3** Cyclic voltammetry displaying the oxidation of 1,1'-dimethylferrocene (initial concentration 13.46 mM) in 15  $\mu\text{L}$   $[\text{C}_4\text{mim}][\text{BF}_4]$  on a 10.4  $\mu\text{m}$  platinum microelectrode at 310.15 K, after (a) 210, (b) 510 and (c) 810 min flow of dry nitrogen.

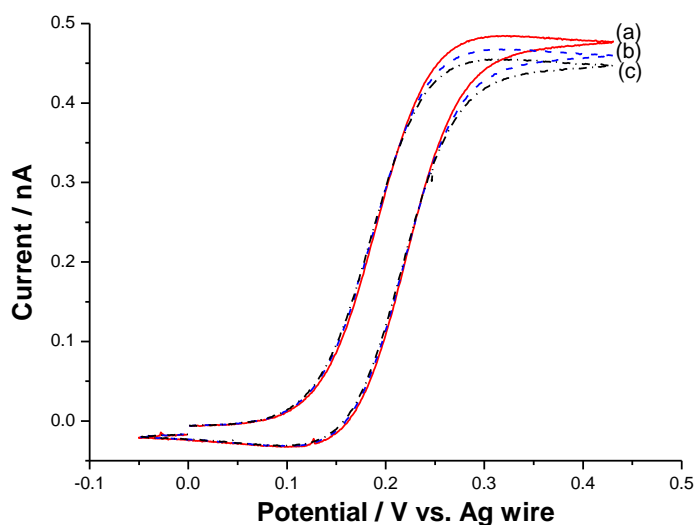

**Figure S4** Cyclic voltammety displaying the oxidation of *n*-butylferrocene (initial concentration 9.90 mM) in 15  $\mu$ L [C<sub>4</sub>mpyrr][NTf<sub>2</sub>] on a 10.4  $\mu$ m platinum microelectrode at 310.15 K, after (a) 210, (b) 510 and (c) 810 min flow of dry nitrogen.

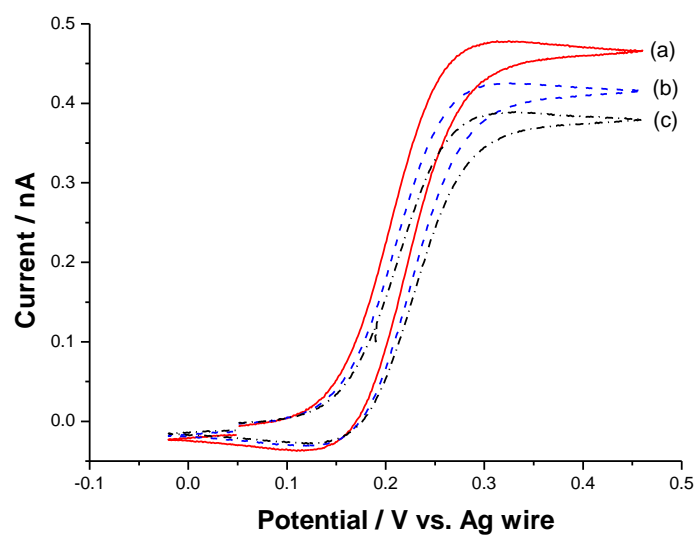

**Figure S5** Cyclic voltammety displaying the oxidation of *n*-butylferrocene (initial concentration 13.30 mM) in 15  $\mu$ L [C<sub>4</sub>mim][BF<sub>4</sub>] on a 10.4  $\mu$ m platinum microelectrode at 310.15 K, after (a) 210, (b) 510 and (c) 810 min flow of dry nitrogen.

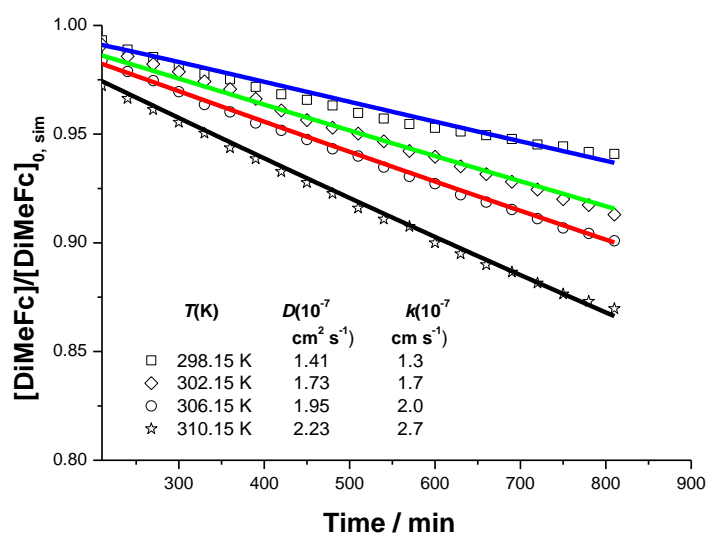

**Figure S6** Experimental (symbols) and simulated (—) concentration profiles for 1,1'-dimethylferrocene in 15  $\mu\text{L}$  of  $[\text{C}_4\text{mpyrr}][\text{NTf}_2]$  over the temperature range of 298.15 – 310.15 K.

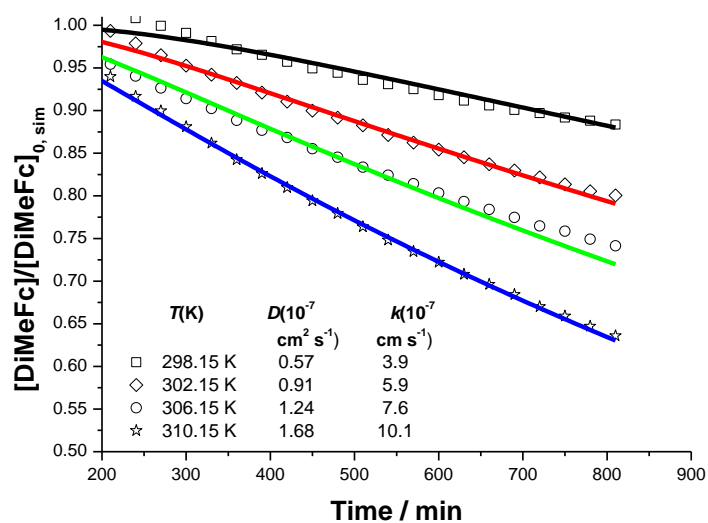

**Figure S7** Experimental (symbols) and simulated (—) concentration profiles for 1,1'-dimethylferrocene in 15  $\mu\text{L}$  of  $[\text{C}_4\text{mim}][\text{BF}_4]$  over the temperature range of 298.15 – 310.15 K.

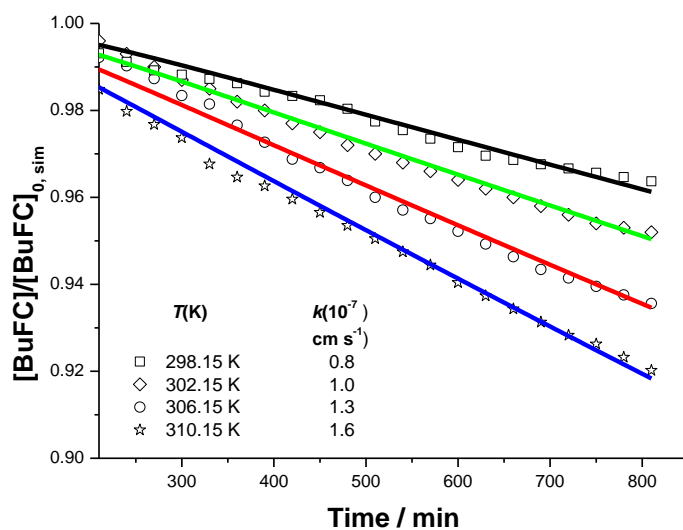

**Figure S8** Experimental (symbols) and simulated (—) concentration profiles for *n*-butylferrocene in 15  $\mu\text{L}$  of  $[\text{C}_4\text{mpyr}][\text{NTf}_2]$  over the temperature range of 298.15 – 310.15 K.

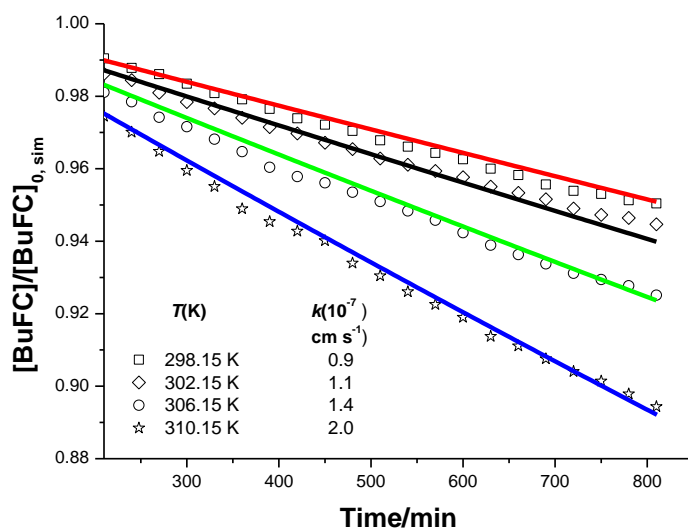

**Figure S9** Experimental (symbols) and simulated (—) concentration profiles for *n*-butylferrocene in 15  $\mu\text{L}$  of  $[\text{C}_2\text{mim}][\text{NTf}_2]$  over the temperature range of 298.15 – 310.15 K.

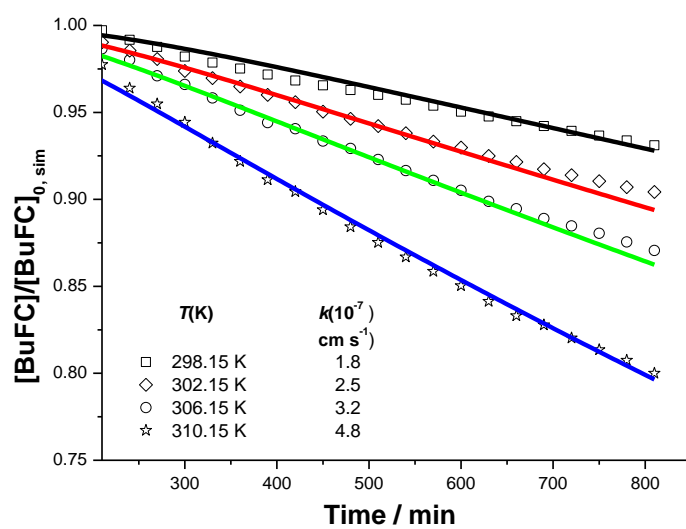

**Figure S10** Experimental (symbols) and simulated (—) concentration profiles for *n*-butylferrocene in 15  $\mu\text{L}$  of  $[\text{C}_4\text{mim}][\text{BF}_4]$  over the temperature range of 298.15 – 310.15 K.
